# Supplementary material for: Opposite Effects Induced by Cholinium-Based Ionic Liquid Electrolytes in the Formation of Aqueous Biphasic Systems Comprising Polyethylene Glycol and Sodium Polyacrylate
Source: MDPI journal article supplement (doi:10.3390/molecules26216612), 2021-10-31
Supplement: s1 [file s1]

## Supplementary Materials

# Opposite effects Induced by Cholinium-Based Ionic Liquid Electrolytes in the Formation of Aqueous Biphasic Systems Comprising Polyethylene Glycol and Sodium Polyacrylate

Sandra C. Bernardo <sup>1</sup>, Emanuel V. Capela <sup>2</sup>, Jorge F. B. Pereira <sup>3</sup>, Sónia P. M. Ventura <sup>2</sup>, Mara G. Freire <sup>2,\*</sup> and João A. P. Coutinho <sup>2,\*</sup>

<sup>1</sup> CICS-UBI—Health Sciences Research Centre, University of Beira Interior, 6200-506 Covilhã, Portugal; sandracbernardo@gmail.com

<sup>2</sup> CICECO—Aveiro Institute of Materials, Department of Chemistry, University of Aveiro, 3810-193 Aveiro, Portugal; emanuelcapela@ua.pt (E.V.C.); spventura@ua.pt (S.P.M.V.)

<sup>3</sup> Univ Coimbra, CIEPQPF, Department of Chemical Engineering, Rua Sílvio Lima, Pólo II—Pinhal de Marrocos, 3030-790 Coimbra, Portugal; jfbpereira@eq.uc.pt

\* Correspondence: maragfreire@ua.pt (M.G.F.); jcoutinho@ua.pt (J.A.P.C.); Tel: +351-234370200 (M.G.F. & J.A.P.C.); Fax: +351-234370084 (M.G.F. & J.A.P.C.)

# Effect of the PEG molecular weight in the formation of ABS composed of PEG + NaPA 8000 + water + 5 wt% of [Ch]<sup>+</sup>-IL as electrolyte

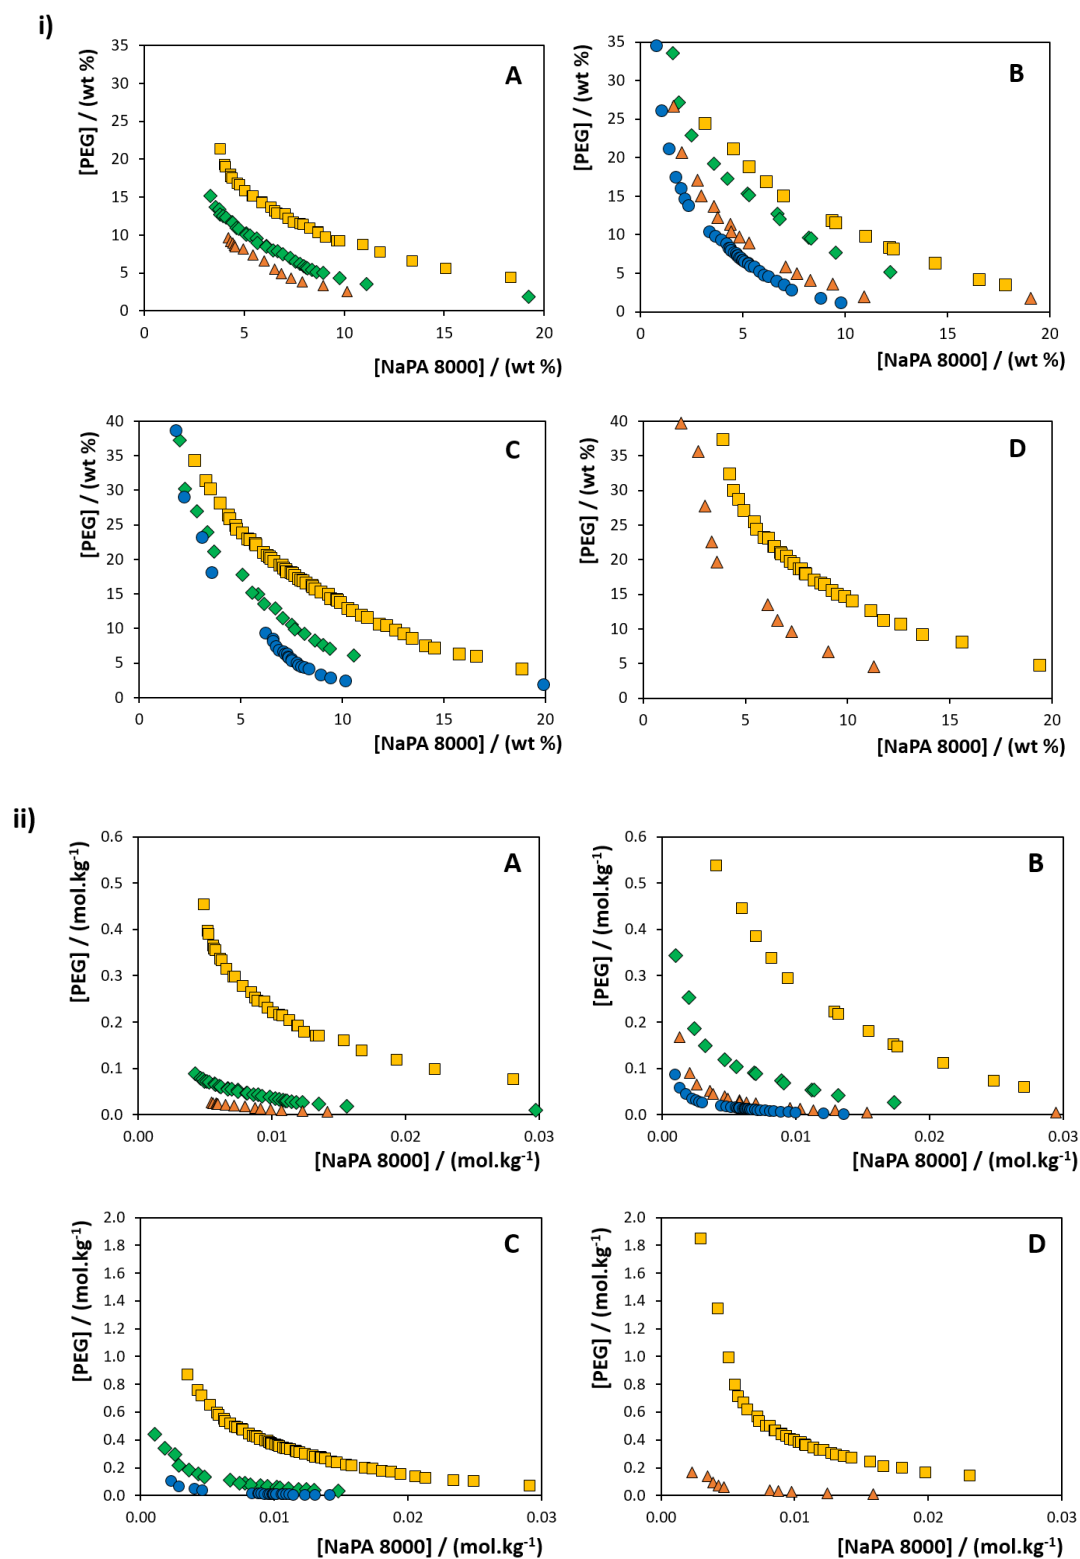

**Figure S1.** Binodal curves for the systems formed by PEG (different molecular weight) + NaPA 8000 + water + 5 wt% of [Ch]<sup>+</sup>-IL as electrolyte: [Ch][Ac] (A), [Ch][DHP] (B), [Ch][DHcit] (C) and [Ch][Bit] (D). PEG molecular weight: PEG 600 (■); PEG 2000 (▲); PEG 4000 (◆); PEG 6000 (●).

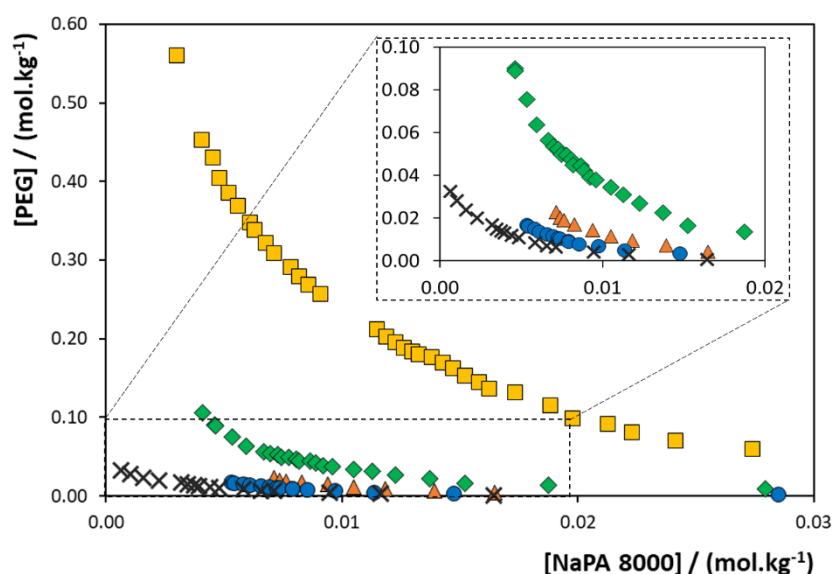

**Figure S2.** Binodal curves for the ABS formed by PEG (different molecular weight) + NaPA 8000 + water + 5 wt% of [Ch]Cl as electrolyte. PEG molecular weight: PEG 600 (■); PEG 2000 (▲); PEG 4000 (◆); PEG 6000 (●).

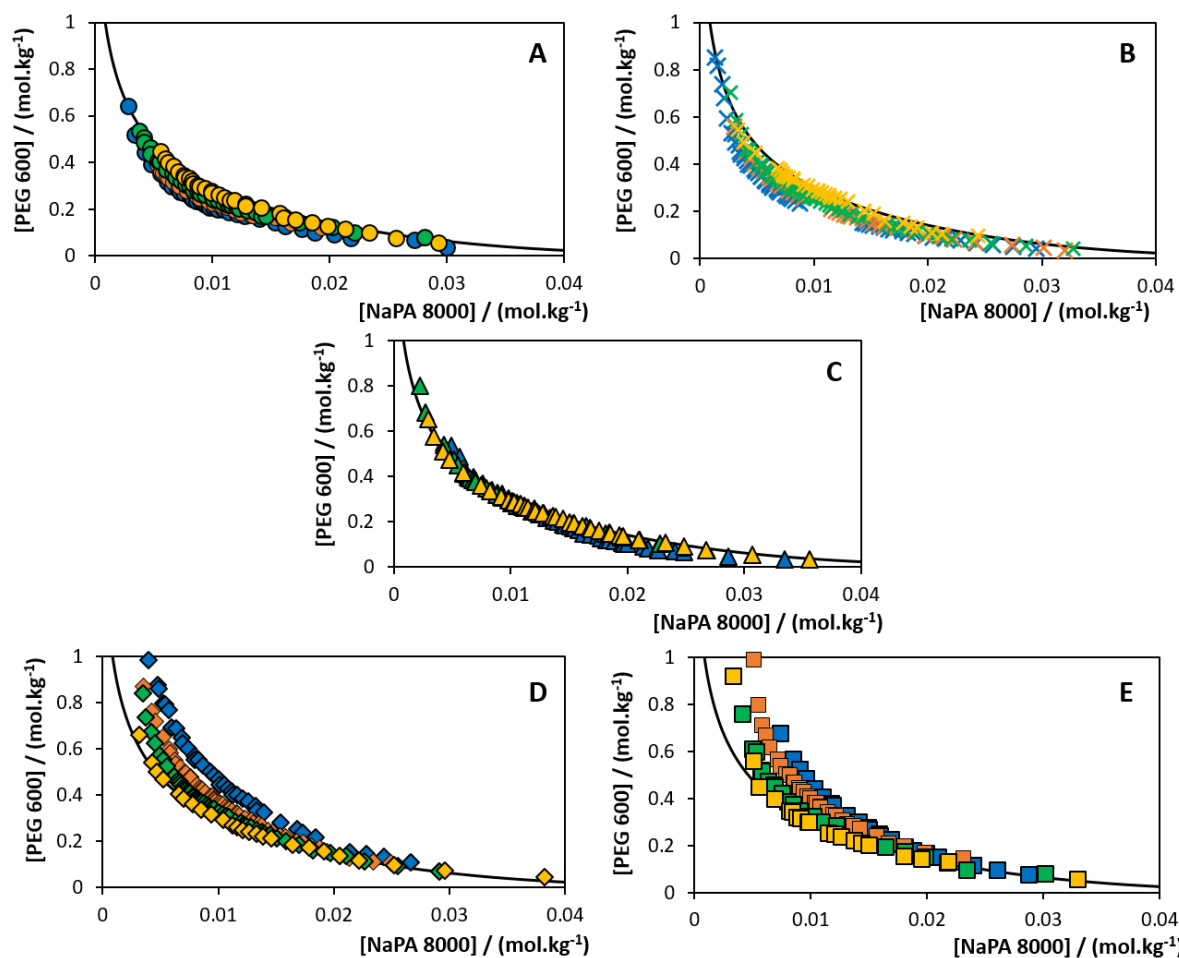

**Figure S3.** Binodal curves, at 300.15 K, for ABS composed of PEG 600, NaPA 8000, and each [Ch]<sup>+</sup>-based IL used as electrolyte: a) [Ch][Ac] (●); b) [Ch]Cl (×); c) [Ch][DHP] (▲); d) [Ch][DHcit] (◆); and e) [Ch][Bit] (■). Distinct colours represent different concentrations, namely 10 wt% (blue), 5 wt% (orange), 2.5 wt% (green), 1 wt% (yellow). The ABS formed by PEG 600 and NaPA 8000 without electrolyte is represented by (—).

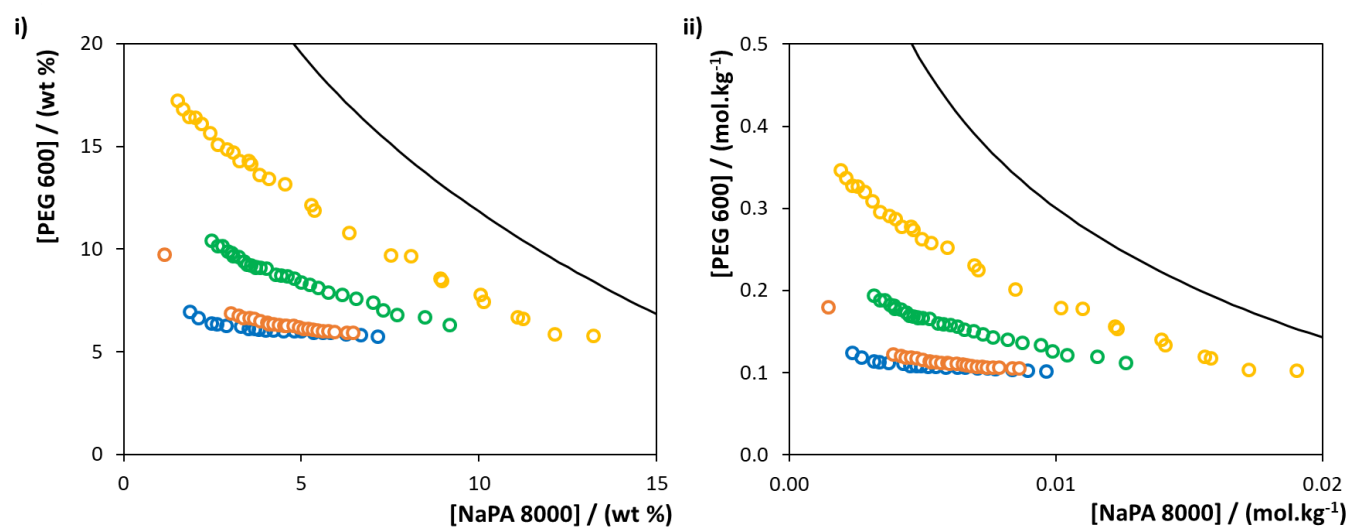

**Figure S4.** Binodal curves, at 300.15 K, for ABS composed of PEG 600, NaPA 8000, and NaCl used as electrolyte. Distinct

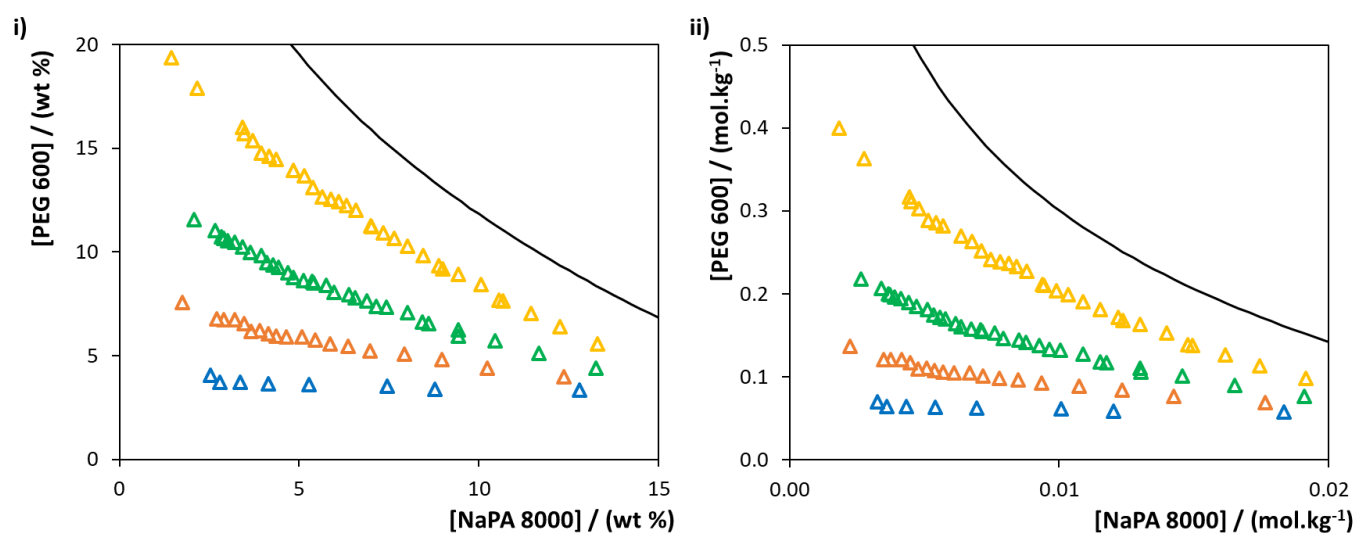

colours represent different concentrations, namely 10 wt% (blue), 5 wt% (orange), 2.5 wt% (green), 1 wt% (yellow).

**Figure S5.** Binodal curves, at 300.15 K, for ABS composed of PEG 600, NaPA 8000, and NaAcetate used as electrolyte. Distinct colours represent different concentrations, namely 10 wt% (blue), 5 wt% (orange), 2.5 wt% (green), 1 wt% (yellow).

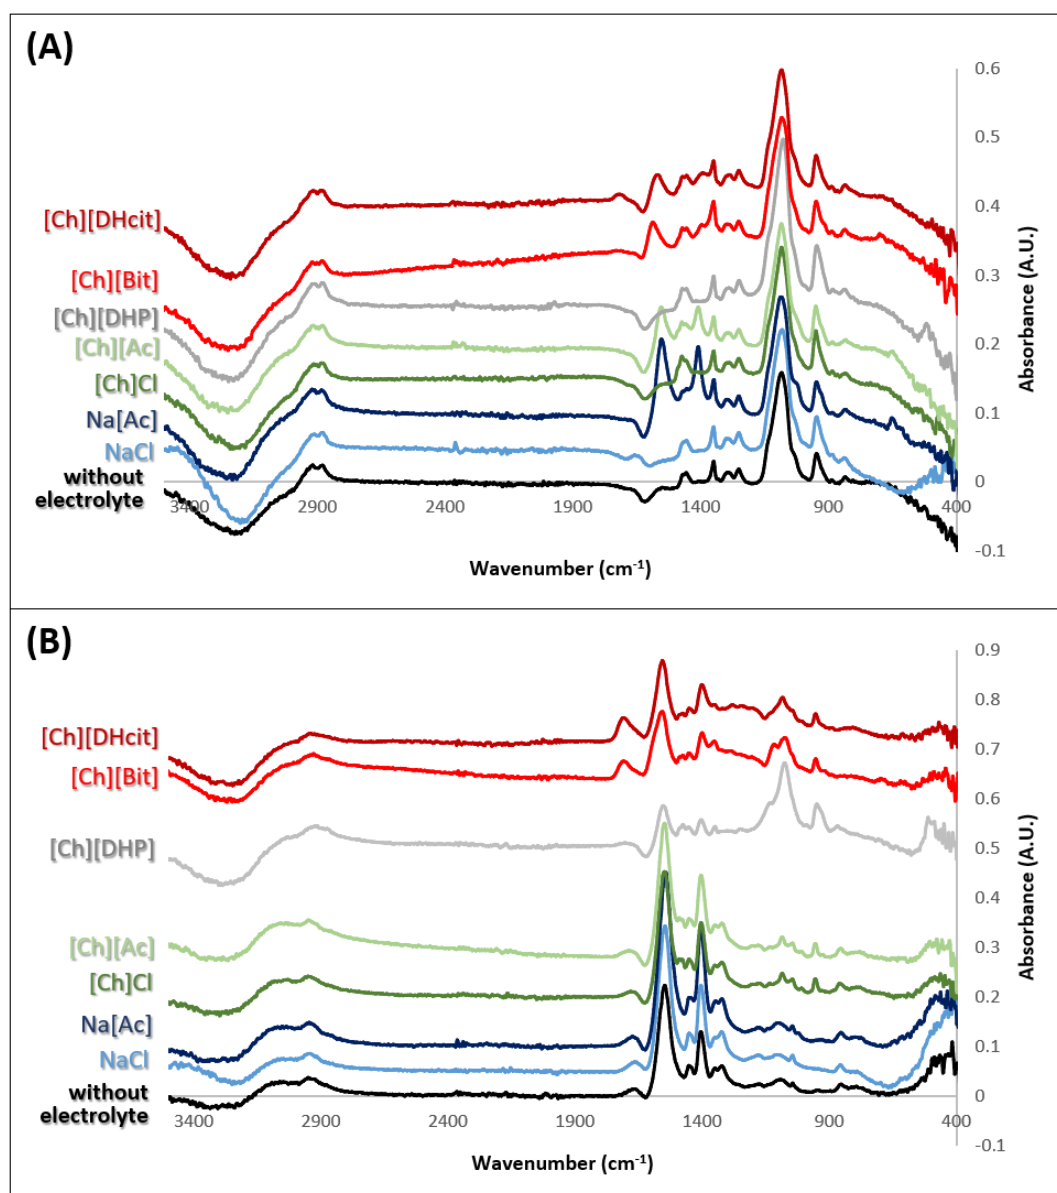

**Figure S6.** ATR-FTIR spectra of the top (PEG-rich) phases (A) and bottom (NaPA-rich) phases (B) measured for the ABS composed of 25 wt% of PEG 600 + 7.5 wt% NaPA 8000 + water (67.5 wt% system without electrolyte or 57.5 wt% with electrolyte) + 10 wt% of the respective electrolyte.

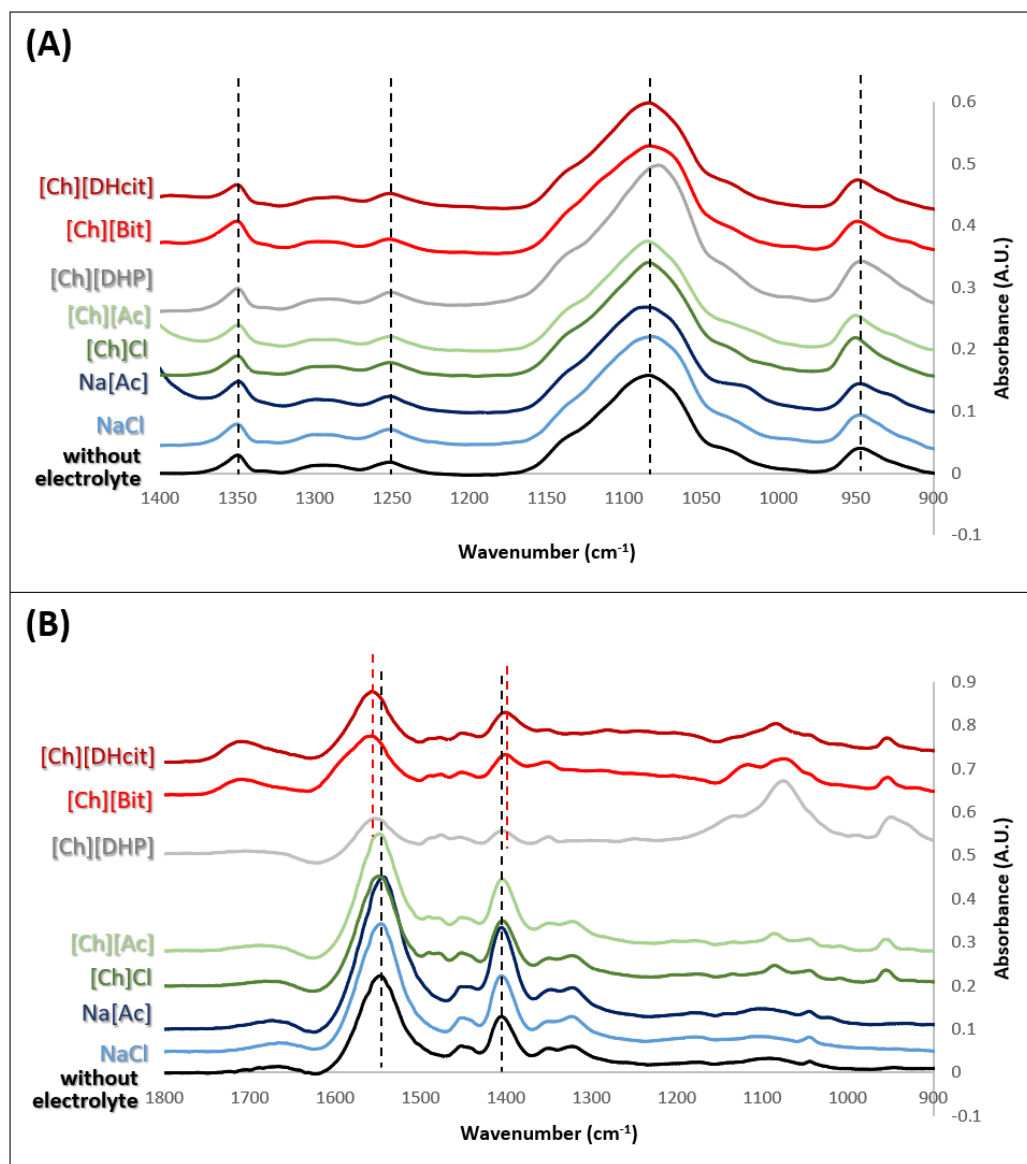

**Figure S7.** ATR-FTIR expanded spectra of the top (PEG-rich) phases (A) and bottom (NaPA-rich) phases (B) measured for the ABS composed of 25 wt% of PEG 600 + 7.5 wt% NaPA 8000 + water (67.5 wt% system without electrolyte or 57.5 wt% with electrolyte) + 10 wt% of the respective electrolyte.

## Experimental weight fraction data corresponding to the solubility curves

**Table S1.** Experimental binodal weight fraction data for the systems composed of PEG (1) + NaPA 8000 (2) + 5 wt% [Ch]Cl + water, determined at 300.15K.

| PEG 600 |         | PEG 2000 |         | PEG 4000 |         | PEG 6000 |         |
|---------|---------|----------|---------|----------|---------|----------|---------|
| 100 w1  | 100 w2  | 100 w1   | 100 w2  | 100 w1   | 100 w2  | 100 w1   | 100 w2  |
| 25.1491 | 2.3364  | 17.3944  | 3.1726  | 8.3313   | 5.3989  | 9.1430   | 4.0836  |
| 21.3523 | 3.1556  | 15.2522  | 3.5561  | 7.4996   | 5.5688  | 8.8037   | 4.1666  |
| 20.5117 | 3.5010  | 15.0750  | 3.5767  | 7.0830   | 5.7551  | 8.2269   | 4.4431  |
| 19.5203 | 3.7108  | 13.0980  | 4.1009  | 6.3609   | 6.2144  | 7.5748   | 4.6539  |
| 18.7926 | 4.0016  | 11.2728  | 4.5327  | 5.4744   | 6.9948  | 6.9902   | 5.0067  |
| 18.1432 | 4.2878  | 10.1529  | 5.0678  | 4.4121   | 7.7595  | 6.5283   | 5.2529  |
| 17.2884 | 4.6484  | 9.6631   | 5.2854  | 3.6436   | 8.6418  | 6.0622   | 5.4773  |
| 16.8672 | 4.7913  | 9.4591   | 5.5026  | 2.7929   | 10.0172 | 5.8532   | 5.5693  |
| 16.1764 | 5.1497  | 9.0366   | 5.6252  | 1.7434   | 11.6509 | 5.1807   | 5.9555  |
| 15.6390 | 5.4029  | 8.9884   | 5.8491  |          |         | 5.0350   | 5.9559  |
| 14.8483 | 5.8827  | 8.6352   | 6.0549  |          |         | 4.4882   | 6.4069  |
| 14.3791 | 6.1344  | 8.2402   | 6.1377  |          |         | 3.9017   | 7.2251  |
| 13.8735 | 6.4168  | 8.1707   | 6.4707  |          |         | 2.7645   | 8.3239  |
| 13.3383 | 6.7710  | 7.7865   | 6.6300  |          |         | 2.0052   | 10.5569 |
| 11.2692 | 8.4250  | 7.2584   | 6.8632  |          |         | 0.9007   | 18.5574 |
| 10.8306 | 8.6766  | 7.0430   | 7.1218  |          |         |          |         |
| 10.5197 | 8.9421  | 6.4155   | 7.7440  |          |         |          |         |
| 10.1831 | 9.1599  | 5.8331   | 8.2823  |          |         |          |         |
| 9.9022  | 9.3963  | 5.1084   | 8.9478  |          |         |          |         |
| 9.7855  | 9.5786  | 4.2865   | 9.8825  |          |         |          |         |
| 9.5854  | 9.9409  | 3.1842   | 10.8559 |          |         |          |         |
| 9.2636  | 10.2435 | 2.6150   | 13.0353 |          |         |          |         |
| 8.8711  | 10.5180 | 1.8522   | 18.2685 |          |         |          |         |
| 8.4300  | 10.8399 |          |         |          |         |          |         |
| 7.9695  | 11.2180 |          |         |          |         |          |         |
| 7.5918  | 11.4997 |          |         |          |         |          |         |
| 7.3320  | 12.1887 |          |         |          |         |          |         |
| 6.4983  | 13.1027 |          |         |          |         |          |         |
| 5.6207  | 13.6698 |          |         |          |         |          |         |
| 5.2406  | 14.5508 |          |         |          |         |          |         |
| 4.6566  | 15.1248 |          |         |          |         |          |         |
| 4.0526  | 16.1773 |          |         |          |         |          |         |
| 3.4361  | 17.9787 |          |         |          |         |          |         |
| 2.6852  | 19.4121 |          |         |          |         |          |         |
| 1.9918  | 20.3835 |          |         |          |         |          |         |

**Table S2.** Experimental binodal weight fraction data for the systems composed of PEG (1) + NaPA 8000 (2) + 5 wt% [Ch][Ac] + water, determined at 300.15K.

| PEG 600 |         | PEG 2000 |         | PEG 4000 |         |
|---------|---------|----------|---------|----------|---------|
| 100 w1  | 100 w2  | 100 w1   | 100 w2  | 100 w1   | 100 w2  |
| 21.4017 | 3.7864  | 15.1460  | 3.3006  | 9.6174   | 4.2166  |
| 19.2553 | 3.9999  | 13.6992  | 3.5856  | 9.1064   | 4.2968  |
| 18.9732 | 4.0378  | 13.4232  | 3.7430  | 8.9808   | 4.4429  |
| 17.9705 | 4.3047  | 12.6516  | 3.8075  | 8.6367   | 4.5057  |
| 17.7180 | 4.3110  | 12.4560  | 3.9420  | 8.4873   | 4.5405  |
| 17.5451 | 4.4039  | 12.2705  | 4.0911  | 8.1821   | 4.9635  |
| 16.7975 | 4.6627  | 11.6826  | 4.3879  | 7.3844   | 5.4372  |
| 16.6444 | 4.7474  | 11.5988  | 4.4120  | 6.5967   | 6.0116  |
| 15.8893 | 5.0285  | 10.8861  | 4.6215  | 5.5113   | 6.5327  |
| 15.1910 | 5.3814  | 10.8032  | 4.7175  | 4.9028   | 6.8400  |
| 15.1512 | 5.4554  | 10.1876  | 5.0888  | 4.3457   | 7.3458  |
| 14.3308 | 5.8885  | 10.0487  | 5.0911  | 3.8404   | 7.8922  |
| 14.3043 | 5.8977  | 9.9626   | 5.3045  | 3.2958   | 8.9568  |
| 13.7125 | 6.3169  | 9.5534   | 5.6218  | 2.5007   | 10.1638 |
| 13.1869 | 6.5189  | 8.9641   | 5.6489  |          |         |
| 12.8489 | 6.6510  | 8.5555   | 6.0932  |          |         |
| 12.7660 | 7.0384  | 8.4145   | 6.1125  |          |         |
| 12.1765 | 7.1943  | 7.9354   | 6.4491  |          |         |
| 11.7017 | 7.4732  | 7.8962   | 6.6856  |          |         |
| 11.5019 | 7.7788  | 7.4211   | 6.9153  |          |         |
| 11.3975 | 7.9332  | 7.0224   | 7.2999  |          |         |
| 10.9419 | 8.2892  | 6.4482   | 7.5787  |          |         |
| 10.3918 | 8.6923  | 6.1606   | 7.7734  |          |         |
| 10.3231 | 8.7050  | 5.8875   | 7.9909  |          |         |
| 9.7496  | 9.0447  | 5.6539   | 8.1069  |          |         |
| 9.2713  | 9.6181  | 5.5980   | 8.1839  |          |         |
| 9.2632  | 9.7591  | 5.3625   | 8.4008  |          |         |
| 8.7851  | 10.9494 | 5.1170   | 8.6253  |          |         |
| 7.7252  | 11.8046 | 4.9913   | 8.9642  |          |         |
| 6.6225  | 13.3984 | 4.3138   | 9.7724  |          |         |
| 5.5533  | 15.0832 | 3.5596   | 11.1107 |          |         |
| 4.3823  | 18.3445 | 1.8910   | 19.2213 |          |         |



**Table S3.** Experimental binodal weight fraction data for the systems composed of PEG (1) + NaPA 8000 (2) + 5 wt% [Ch][DHP] + water, determined at 300.15K.

| PEG 600 |         | PEG 2000 |         | PEG 4000 |         | PEG 6000 |        |        |         |
|---------|---------|----------|---------|----------|---------|----------|--------|--------|---------|
| 100 w1  | 100 w2  | 100 w1   | 100 w2  | 100 w1   | 100 w2  | 100 w1   | 100 w2 | 100 w1 | 100 w2  |
| 24.4297 | 3.1373  | 40.6956  | 0.8139  | 40.1585  | 1.0337  | 34.4945  | 0.7568 | 6.9796 | 4.8275  |
| 21.0999 | 4.5286  | 33.5871  | 1.5930  | 26.6726  | 1.6020  | 26.0814  | 1.0361 | 6.9490 | 4.8923  |
| 18.8096 | 5.3104  | 27.1566  | 1.8711  | 20.6659  | 2.0199  | 21.1803  | 1.4024 | 6.7227 | 4.9847  |
| 16.8888 | 6.1427  | 22.9208  | 2.4979  | 17.1142  | 2.7721  | 17.4782  | 1.7365 | 6.7185 | 5.0277  |
| 15.0411 | 6.9715  | 19.1875  | 3.5885  | 15.0704  | 2.9723  | 16.0258  | 1.9903 | 6.5236 | 5.0809  |
| 11.7951 | 9.3382  | 17.2279  | 4.2429  | 13.6400  | 3.5964  | 14.6184  | 2.1740 | 6.3523 | 5.2549  |
| 11.5536 | 9.5282  | 15.3528  | 5.2193  | 12.2534  | 3.7621  | 13.7749  | 2.3465 | 6.2266 | 5.2721  |
| 9.8168  | 10.9834 | 15.0861  | 5.3178  | 11.3541  | 4.4049  | 10.3681  | 3.3771 | 5.9715 | 5.3706  |
| 8.3572  | 12.1637 | 12.7565  | 6.6735  | 10.3885  | 4.4326  | 9.8122   | 3.6758 | 5.7921 | 5.5544  |
| 8.1333  | 12.3493 | 12.0768  | 6.7858  | 9.7035   | 4.8143  | 9.2789   | 3.9486 | 5.2872 | 5.7989  |
| 6.2687  | 14.3867 | 9.6191   | 8.2111  | 8.9501   | 5.3091  | 8.8003   | 4.1911 | 4.7896 | 6.0468  |
| 4.2163  | 16.5466 | 9.5248   | 8.3384  | 5.8503   | 7.0902  | 8.2964   | 4.3033 | 4.5827 | 6.2645  |
| 3.4545  | 17.8155 | 7.6681   | 9.5471  | 4.9581   | 7.6451  | 8.2094   | 4.3717 | 4.0318 | 6.6381  |
|         |         | 5.1469   | 12.1886 | 4.0733   | 8.2967  | 7.9321   | 4.4122 | 3.5199 | 7.0101  |
|         |         |          |         | 3.6442   | 9.3823  | 7.9146   | 4.4346 | 2.8077 | 7.3688  |
|         |         |          |         | 1.9809   | 10.9239 | 7.6513   | 4.5819 | 1.7734 | 8.8212  |
|         |         |          |         | 1.7982   | 19.0826 | 7.5988   | 4.6636 | 1.1364 | 9.7894  |
|         |         |          |         |          |         | 7.3190   | 4.7252 | 1.1345 | 20.1040 |
|         |         |          |         |          |         | 7.2579   | 4.7600 |        |         |

**Table S4.** Experimental binodal weight fraction data for the systems composed of PEG (1) + NaPA 8000 (2) + 5 wt% [Ch][DHcit] + water, determined at 300.15K.

| PEG 600 |        |         |         | PEG 2000 |         | PEG 6000 |        |        |         |
|---------|--------|---------|---------|----------|---------|----------|--------|--------|---------|
| 100 w1  | 100 w2 | 100 w1  | 100 w2  | 100 w1   | 100 w2  | 100 w1   | 100 w2 | 100 w1 | 100 w2  |
| 57.6120 | 0.7478 | 17.2403 | 7.8416  | 46.9251  | 0.8473  | 38.6150  | 1.8036 | 5.3881 | 7.5172  |
| 34.3054 | 2.7416 | 17.0602 | 7.9706  | 40.6456  | 1.4423  | 29.0086  | 2.2189 | 5.0224 | 7.7864  |
| 31.3698 | 3.2824 | 16.8770 | 8.0700  | 37.1967  | 2.0046  | 23.1217  | 3.1035 | 4.7198 | 7.8390  |
| 30.1640 | 3.4983 | 16.6071 | 8.2083  | 30.2088  | 2.2366  | 18.1094  | 3.5725 | 4.4872 | 7.9944  |
| 28.0897 | 3.9969 | 16.2660 | 8.4998  | 26.9246  | 2.8231  | 9.3457   | 6.2399 | 4.3237 | 8.1565  |
| 26.4449 | 4.3812 | 16.0804 | 8.5396  | 23.9236  | 3.3458  | 8.5274   | 6.5801 | 4.1221 | 8.3500  |
| 25.9101 | 4.4693 | 15.6927 | 8.6625  | 21.1660  | 3.6994  | 8.1735   | 6.6038 | 3.2682 | 8.9434  |
| 24.8802 | 4.7702 | 15.2476 | 8.9554  | 17.8206  | 5.0826  | 7.4045   | 6.7464 | 2.8488 | 9.4386  |
| 24.3640 | 4.8088 | 14.9280 | 9.3237  | 14.9694  | 5.8651  | 6.8973   | 6.8790 | 2.4648 | 10.1561 |
| 23.7758 | 5.0868 | 14.3502 | 9.4292  | 12.8949  | 6.7083  | 6.6356   | 7.1129 | 1.8362 | 19.9296 |
| 22.9845 | 5.3585 | 14.2403 | 9.7241  | 11.4689  | 7.0586  | 6.3505   | 7.1843 |        |         |
| 22.8497 | 5.4682 | 14.0816 | 9.7553  | 10.5672  | 7.5269  | 6.2807   | 7.2981 |        |         |
| 22.2941 | 5.7055 | 13.7589 | 9.9232  | 9.9017   | 7.6790  | 5.8581   | 7.3242 |        |         |
| 22.1434 | 5.7341 | 12.9219 | 10.2577 | 9.2061   | 8.1421  | 5.7508   | 7.3802 |        |         |
| 21.0172 | 6.0988 | 12.6329 | 10.4988 | 8.3119   | 8.6505  | 5.5907   | 7.4979 |        |         |
| 20.5719 | 6.3000 | 11.8999 | 10.9395 | 7.5862   | 9.0439  |          |        |        |         |
| 20.3958 | 6.4215 | 11.5913 | 11.2237 | 7.0916   | 9.4050  |          |        |        |         |
| 20.1778 | 6.4756 | 10.6640 | 11.8196 | 6.0671   | 10.5600 |          |        |        |         |
| 19.7313 | 6.6378 | 10.4120 | 12.1759 | 13.5170  | 6.1651  |          |        |        |         |
| 19.1847 | 6.9432 | 9.7228  | 12.6220 | 15.1955  | 5.5796  |          |        |        |         |
| 19.1301 | 7.0480 | 9.2715  | 13.0348 |          |         |          |        |        |         |
| 18.7089 | 7.1195 | 8.5963  | 13.4540 |          |         |          |        |        |         |
| 18.5329 | 7.2034 | 7.5510  | 14.1189 |          |         |          |        |        |         |
| 18.2212 | 7.2600 | 7.1311  | 14.5535 |          |         |          |        |        |         |
| 18.0815 | 7.4733 | 6.3375  | 15.7635 |          |         |          |        |        |         |
| 17.9678 | 7.5607 | 5.9758  | 16.6236 |          |         |          |        |        |         |
| 17.6495 | 7.6487 | 4.1325  | 18.8669 |          |         |          |        |        |         |

**Table S5.** Experimental binodal weight fraction data for the systems composed of PEG (1) + NaPA 8000 (2) + 5 wt% [Ch][Bit] + water, determined at 300.15K.

| PEG 600 |        |         |         | PEG 4000 |         |
|---------|--------|---------|---------|----------|---------|
| 100 w1  | 100 w2 | 100 w1  | 100 w2  | 100 w1   | 100 w2  |
| 62.2136 | 1.7814 | 19.4539 | 7.3749  | 39.6989  | 1.8437  |
| 52.5733 | 2.3021 | 18.7232 | 7.6140  | 35.6251  | 2.6937  |
| 44.6771 | 3.2771 | 18.6921 | 7.7185  | 27.7177  | 3.0314  |
| 37.3126 | 3.8869 | 18.0215 | 7.9331  | 22.5812  | 3.3373  |
| 32.3674 | 4.2323 | 17.9061 | 7.9695  | 19.6730  | 3.6096  |
| 29.9647 | 4.4224 | 17.1094 | 8.3706  | 13.4993  | 6.0994  |
| 28.6764 | 4.6788 | 16.5921 | 8.6832  | 11.2195  | 6.5543  |
| 27.0796 | 4.9042 | 16.4422 | 8.8648  | 9.6106   | 7.2659  |
| 25.4448 | 5.4349 | 15.5315 | 9.2420  | 6.7214   | 9.0401  |
| 24.3991 | 5.5574 | 14.9597 | 9.4808  | 4.5749   | 11.2690 |
| 23.2431 | 5.9013 | 14.6365 | 9.8653  | 1.7670   | 20.0187 |
| 23.1088 | 6.1244 | 14.0050 | 10.2305 |          |         |
| 21.9647 | 6.3742 | 12.6883 | 11.1395 |          |         |
| 21.9000 | 6.4050 | 11.2239 | 11.7630 |          |         |
| 21.0747 | 6.7205 | 10.6607 | 12.5969 |          |         |
| 20.8167 | 6.7377 | 9.2180  | 13.6766 |          |         |
| 20.4978 | 6.9869 | 8.0577  | 15.5889 |          |         |
| 19.7306 | 7.1758 | 4.8035  | 19.3919 |          |         |

**Table S6.** Experimental binodal weight fraction data for the systems composed of PEG 600 (1) + NaPA 8000 (2) + water + 1 wt% of [Ch]X, X = Cl and [Ac], determined at 300.15K.

| [Ch]Cl  |         |        |         | [Ch][Ac] |         |        |         |
|---------|---------|--------|---------|----------|---------|--------|---------|
| 100 w1  | 100 w2  | 100 w1 | 100 w2  | 100 w1   | 100 w2  | 100 w1 | 100 w2  |
| 24.7644 | 2.5866  | 8.7921 | 11.4887 | 21.1471  | 4.2748  | 8.0249 | 12.8621 |
| 22.8099 | 2.9850  | 8.2995 | 12.4953 | 20.0032  | 4.5362  | 7.2308 | 13.6659 |
| 21.1635 | 3.7729  | 7.6290 | 12.8927 | 19.4416  | 4.7412  | 6.4584 | 14.5580 |
| 18.6200 | 5.1626  | 7.3259 | 13.2123 | 18.7358  | 5.0813  | 5.6921 | 15.7508 |
| 18.3432 | 5.3492  | 6.2233 | 14.0118 | 17.9019  | 5.3799  | 4.4936 | 17.0376 |
| 17.9359 | 5.4424  | 5.8839 | 14.5126 | 17.1447  | 5.6854  | 3.2654 | 18.9647 |
| 17.4975 | 5.5353  | 5.4269 | 16.3113 | 16.8365  | 5.7414  |        |         |
| 17.3001 | 5.7004  |        |         | 16.6972  | 5.9994  |        |         |
| 17.1200 | 5.8521  |        |         | 16.2704  | 6.2119  |        |         |
| 16.9294 | 6.1327  |        |         | 15.7760  | 6.2494  |        |         |
| 16.6101 | 6.1703  |        |         | 15.3494  | 6.5435  |        |         |
| 15.8423 | 6.7780  |        |         | 15.1687  | 6.6279  |        |         |
| 15.5939 | 7.0285  |        |         | 14.8980  | 6.9343  |        |         |
| 14.9019 | 7.3140  |        |         | 14.3730  | 7.3603  |        |         |
| 14.7492 | 7.6450  |        |         | 13.9868  | 7.3612  |        |         |
| 14.6913 | 7.6576  |        |         | 13.6478  | 7.7530  |        |         |
| 14.3648 | 7.8848  |        |         | 13.1188  | 8.0730  |        |         |
| 14.1696 | 8.0844  |        |         | 12.6152  | 8.3937  |        |         |
| 13.9223 | 8.3110  |        |         | 12.5757  | 8.6880  |        |         |
| 13.4772 | 8.3933  |        |         | 11.8770  | 9.2930  |        |         |
| 13.4633 | 8.6620  |        |         | 11.4258  | 9.3214  |        |         |
| 13.1352 | 8.9489  |        |         | 11.0650  | 10.1871 |        |         |
| 12.7467 | 9.3719  |        |         | 9.8967   | 11.2003 |        |         |
| 10.9479 | 10.3489 |        |         | 9.0564   | 11.3919 |        |         |
| 10.2497 | 10.8720 |        |         | 8.4841   | 12.0351 |        |         |

**Table S7.** Experimental binodal weight fraction data for the systems composed of PEG 600 (1) + NaPA 8000 (2) + water + 1 wt% of [Ch]X, X = [DHP], [DHcit] and [Bit], determined at 300.15K.

| [Ch][DHP] |         |        |         | [Ch][DHcit] |         | [Ch][Bit] |         |
|-----------|---------|--------|---------|-------------|---------|-----------|---------|
| 100 w1    | 100 w2  | 100 w1 | 100 w2  | 100 w1      | 100 w2  | 100 w1    | 100 w2  |
| 28.2076   | 2.2987  | 8.7364 | 12.3446 | 28.3673     | 2.4709  | 35.6599   | 2.5653  |
| 25.6730   | 2.6584  | 8.3535 | 12.8696 | 24.5402     | 3.2896  | 25.1579   | 3.8820  |
| 23.5209   | 3.2325  | 8.1968 | 12.8998 | 23.0655     | 3.5776  | 21.3774   | 4.2111  |
| 22.1828   | 3.6726  | 7.7622 | 13.3778 | 21.9428     | 4.0033  | 19.3431   | 5.2412  |
| 20.0503   | 4.5662  | 7.5309 | 13.5488 | 19.6006     | 5.0370  | 17.3022   | 6.1283  |
| 17.8177   | 5.6243  | 6.7364 | 14.3643 | 18.7389     | 5.2753  | 17.1258   | 6.3010  |
| 16.8300   | 6.1749  | 6.0453 | 15.6966 | 17.8160     | 5.8428  | 16.2485   | 6.5636  |
| 15.7126   | 6.8737  | 5.2533 | 16.5986 | 16.8660     | 6.3675  | 16.0653   | 6.8077  |
| 15.0580   | 7.2959  | 4.2589 | 17.6372 | 15.9030     | 7.0111  | 15.3889   | 7.2372  |
| 14.6884   | 7.5361  | 3.1925 | 19.7201 | 15.0135     | 7.7197  | 15.2781   | 7.2661  |
| 14.6338   | 7.5885  | 2.0471 | 22.1697 | 13.9400     | 8.2194  | 13.2115   | 8.4185  |
| 14.2320   | 7.9715  |        |         | 13.5506     | 8.5153  | 13.0044   | 8.7555  |
| 13.7331   | 8.2703  |        |         | 13.0627     | 8.8457  | 12.5520   | 9.1417  |
| 13.5107   | 8.4096  |        |         | 12.6685     | 9.1976  | 11.7446   | 9.8744  |
| 13.3123   | 8.7727  |        |         | 12.2728     | 9.6172  | 11.2502   | 10.3094 |
| 12.8512   | 8.8393  |        |         | 11.7206     | 9.9579  | 10.9512   | 10.6760 |
| 12.4411   | 9.2440  |        |         | 11.2720     | 10.4491 | 8.6116    | 12.5882 |
| 11.8839   | 9.8384  |        |         | 9.9805      | 11.5979 | 7.9057    | 13.4808 |
| 11.6682   | 9.9531  |        |         | 9.3224      | 12.4804 | 7.3917    | 14.8568 |
| 11.2657   | 10.3691 |        |         | 8.5829      | 13.2832 | 3.3296    | 20.8293 |
| 10.5741   | 10.7631 |        |         | 7.5314      | 14.0628 |           |         |
| 10.3213   | 10.9652 |        |         | 6.4754      | 15.0422 |           |         |
| 9.7359    | 11.4273 |        |         | 5.4520      | 16.7978 |           |         |
| 9.4573    | 11.8174 |        |         | 4.1225      | 19.1531 |           |         |
| 9.2159    | 11.8894 |        |         | 2.6295      | 23.4147 |           |         |

**Table S8.** Experimental binodal weight fraction data for the systems composed of PEG 600 (1) + NaPA 8000 (2) + water + 2.5 wt% of [Ch]X, X = Cl and [Ac], determined at 300.15K.

| [Ch]Cl  |        |         |         | [Ch][Ac] |        |         |         |
|---------|--------|---------|---------|----------|--------|---------|---------|
| 100 w1  | 100 w2 | 100 w1  | 100 w2  | 100 w1   | 100 w2 | 100 w1  | 100 w2  |
| 29.6776 | 2.1156 | 13.6448 | 7.0901  | 24.3756  | 2.9152 | 10.0362 | 9.8804  |
| 26.0777 | 2.4486 | 13.5190 | 7.2218  | 23.3797  | 3.2038 | 9.3952  | 10.1686 |
| 23.9821 | 2.8264 | 13.3243 | 7.3614  | 22.7240  | 3.2194 | 9.3624  | 10.4365 |
| 21.7580 | 3.1643 | 13.1955 | 7.4897  | 21.8338  | 3.6184 | 9.0611  | 11.4447 |
| 21.6817 | 3.2976 | 12.7675 | 7.7748  | 20.8342  | 3.6407 | 8.0281  | 12.2205 |
| 21.0214 | 3.4262 | 12.4112 | 8.1036  | 19.7260  | 4.1170 | 7.0118  | 13.9448 |
| 19.7696 | 3.8520 | 11.9521 | 8.3230  | 19.5468  | 4.2379 | 5.6270  | 15.0265 |
| 19.2867 | 4.1178 | 11.5887 | 8.5021  | 18.1224  | 4.6052 | 4.6331  | 18.3442 |
| 18.9950 | 4.1551 | 11.3073 | 8.8798  | 17.5007  | 5.0399 |         |         |
| 18.3678 | 4.3825 | 10.7977 | 9.1568  | 16.7868  | 5.1870 |         |         |
| 18.1599 | 4.5712 | 10.2048 | 9.4998  | 16.2257  | 5.4972 |         |         |
| 18.0802 | 4.5834 | 9.7665  | 9.9999  | 15.4808  | 5.8008 |         |         |
| 17.5848 | 4.7993 | 9.5280  | 10.3049 | 15.4076  | 6.0075 |         |         |
| 17.4243 | 4.8166 | 8.0102  | 11.6228 | 14.5772  | 6.2251 |         |         |
| 17.1615 | 4.9825 | 7.5713  | 11.9171 | 14.3455  | 6.5046 |         |         |
| 16.8446 | 5.1393 | 7.2065  | 12.2980 | 13.7975  | 6.6872 |         |         |
| 16.7013 | 5.3058 | 6.7393  | 12.6590 | 13.6026  | 6.9376 |         |         |
| 16.6000 | 5.3555 | 6.3636  | 13.2113 | 13.0951  | 7.4091 |         |         |
| 16.2403 | 5.4926 | 5.9752  | 13.8277 | 12.7339  | 7.4263 |         |         |
| 15.7187 | 5.7442 | 5.3474  | 14.3589 | 12.4609  | 7.6928 |         |         |
| 15.2978 | 5.9354 | 4.7927  | 14.9810 | 11.9406  | 8.0407 |         |         |
| 15.1719 | 6.1026 | 4.4077  | 15.9317 | 11.6639  | 8.3294 |         |         |
| 14.9314 | 6.2885 | 3.8118  | 16.9360 | 11.5966  | 8.4569 |         |         |
| 14.6389 | 6.4750 | 3.2162  | 18.6362 | 11.2212  | 8.7950 |         |         |
| 14.3080 | 6.6787 | 2.4686  | 20.7526 | 10.9275  | 8.9281 |         |         |
| 14.0932 | 6.8984 |         |         | 10.6003  | 9.3934 |         |         |

**Table S9.** Experimental binodal weight fraction data for the systems composed of PEG 600 (1) + NaPA 8000 (2) + water + 2.5 wt% of [Ch]X, X = [DHP], [Bit] and [DHcit], determined at 300.15K.

| [Ch][DHP] |         | [Ch][Bit] |         | [Ch][DHcit] |        |         |         |
|-----------|---------|-----------|---------|-------------|--------|---------|---------|
| 100 w1    | 100 w2  | 100 w1    | 100 w2  | 100 w1      | 100 w2 | 100 w1  | 100 w2  |
| 48.4052   | 0.6514  | 38.0560   | 2.6711  | 38.1256     | 2.2127 | 16.9202 | 7.1553  |
| 39.1697   | 1.3816  | 31.4109   | 3.1864  | 33.4958     | 2.6858 | 16.3463 | 7.3697  |
| 32.4314   | 1.7746  | 26.8374   | 3.8153  | 30.6888     | 2.9078 | 16.3142 | 7.4397  |
| 29.0554   | 2.1187  | 26.5532   | 4.0584  | 28.7751     | 3.2251 | 15.9326 | 7.6402  |
| 24.4036   | 3.2898  | 23.9127   | 4.3209  | 27.2878     | 3.5105 | 15.6017 | 7.8093  |
| 22.2024   | 3.9447  | 23.7192   | 4.4333  | 25.6090     | 3.7999 | 15.5912 | 7.8427  |
| 21.1886   | 4.1691  | 22.2060   | 4.8198  | 24.8546     | 3.9990 | 15.5405 | 8.0414  |
| 19.8640   | 4.5427  | 21.6017   | 5.1743  | 24.0053     | 4.2628 | 14.6877 | 8.4119  |
| 19.7366   | 4.7663  | 21.2426   | 5.2137  | 22.4668     | 4.7181 | 14.4452 | 8.7066  |
| 19.2505   | 4.8147  | 20.2243   | 5.6645  | 21.6957     | 4.8771 | 14.0338 | 8.8727  |
| 19.0756   | 4.9146  | 18.8472   | 5.9919  | 21.5741     | 5.0818 | 13.9237 | 8.9325  |
| 18.7354   | 5.0977  | 18.3591   | 6.3342  | 21.0519     | 5.1199 | 13.6906 | 9.0280  |
| 18.6701   | 5.2802  | 17.4041   | 6.7259  | 20.7797     | 5.2891 | 13.4776 | 9.2883  |
| 18.4214   | 5.2825  | 16.3409   | 7.0843  | 20.3360     | 5.3060 | 13.0519 | 9.6308  |
| 17.6771   | 5.6816  | 16.2930   | 7.5520  | 20.1393     | 5.3853 | 12.6131 | 9.9355  |
| 17.1730   | 5.9750  | 15.3690   | 8.0543  | 19.8464     | 5.5274 | 12.3253 | 10.0561 |
| 16.9045   | 6.2674  | 14.6267   | 8.8768  | 19.7785     | 5.6375 | 12.1291 | 10.3837 |
| 16.0503   | 6.5848  | 10.6126   | 11.5955 | 19.7209     | 5.6752 | 11.3310 | 10.7489 |
| 15.4969   | 6.9046  | 9.6025    | 12.6109 | 19.1566     | 5.8076 | 10.7664 | 11.2389 |
| 14.7707   | 7.4838  | 8.3853    | 13.6789 | 19.0180     | 5.9136 | 9.9905  | 11.9503 |
| 14.0350   | 7.7969  | 7.2142    | 14.7947 | 18.9047     | 6.1008 | 8.7796  | 12.6744 |
| 13.9763   | 8.1935  | 5.4628    | 15.7811 | 18.5814     | 6.1067 | 8.2214  | 13.6262 |
| 13.0778   | 8.7481  | 4.7131    | 19.4162 | 18.4113     | 6.2271 | 7.5739  | 14.4080 |
| 12.4113   | 9.3075  |           |         | 18.3170     | 6.2912 | 6.4155  | 15.3259 |
| 10.3199   | 10.9585 |           |         | 18.1290     | 6.3572 | 5.2809  | 16.9510 |
| 9.7430    | 11.6136 |           |         | 17.9483     | 6.5183 | 3.9536  | 18.8896 |
| 8.1999    | 12.6479 |           |         | 17.6931     | 6.6947 |         |         |
| 7.3703    | 13.4506 |           |         | 17.4005     | 6.8032 |         |         |
| 6.6204    | 14.4006 |           |         | 17.3349     | 6.8522 |         |         |
| 5.7693    | 15.4119 |           |         | 17.0689     | 6.9978 |         |         |

**Table S10.** Experimental binodal weight fraction data for the systems composed of PEG 600 (1) + NaPA 8000 (2) + water + 5 wt% of [Ch]X, X = Cl and [Ac], determined at 300.15K.

| [Ch]Cl  |         |        |         | [Ch][Ac] |         |        |         |
|---------|---------|--------|---------|----------|---------|--------|---------|
| 100 w1  | 100 w2  | 100 w1 | 100 w2  | 100 w1   | 100 w2  | 100 w1 | 100 w2  |
| 25.1491 | 2.3364  | 5.6207 | 13.6698 | 21.4017  | 3.7864  | 7.7252 | 11.8046 |
| 21.3523 | 3.1556  | 5.2406 | 14.5508 | 19.2553  | 3.9999  | 6.6225 | 13.3984 |
| 20.5117 | 3.5010  | 4.6566 | 15.1248 | 18.9732  | 4.0378  | 5.5533 | 15.0832 |
| 19.5203 | 3.7108  | 4.0526 | 16.1773 | 17.9705  | 4.3047  | 4.3823 | 18.3445 |
| 18.7926 | 4.0016  | 3.4361 | 17.9787 | 17.7180  | 4.3110  |        |         |
| 18.1432 | 4.2878  | 2.6852 | 19.4121 | 17.5451  | 4.4039  |        |         |
| 17.2884 | 4.6484  | 1.9918 | 20.3835 | 16.7975  | 4.6627  |        |         |
| 16.8672 | 4.7913  |        |         | 16.6444  | 4.7474  |        |         |
| 16.1764 | 5.1497  |        |         | 15.8893  | 5.0285  |        |         |
| 15.6390 | 5.4029  |        |         | 15.1910  | 5.3814  |        |         |
| 14.8483 | 5.8827  |        |         | 15.1512  | 5.4554  |        |         |
| 14.3791 | 6.1344  |        |         | 14.3308  | 5.8885  |        |         |
| 13.8735 | 6.4168  |        |         | 14.3043  | 5.8977  |        |         |
| 13.3383 | 6.7710  |        |         | 13.7125  | 6.3169  |        |         |
| 11.2692 | 8.4250  |        |         | 13.1869  | 6.5189  |        |         |
| 10.8306 | 8.6766  |        |         | 12.8489  | 6.6510  |        |         |
| 10.5197 | 8.9421  |        |         | 12.7660  | 7.0384  |        |         |
| 10.1831 | 9.1599  |        |         | 12.1765  | 7.1943  |        |         |
| 9.9022  | 9.3963  |        |         | 11.7017  | 7.4732  |        |         |
| 9.7855  | 9.5786  |        |         | 11.5019  | 7.7788  |        |         |
| 9.5854  | 9.9409  |        |         | 11.3975  | 7.9332  |        |         |
| 9.2636  | 10.2435 |        |         | 10.9419  | 8.2892  |        |         |
| 8.8711  | 10.5180 |        |         | 10.3918  | 8.6923  |        |         |
| 8.4300  | 10.8399 |        |         | 10.3231  | 8.7050  |        |         |
| 7.9695  | 11.2180 |        |         | 9.7496   | 9.0447  |        |         |
| 7.5918  | 11.4997 |        |         | 9.2713   | 9.6181  |        |         |
| 7.3320  | 12.1887 |        |         | 9.2632   | 9.7591  |        |         |
| 6.4983  | 13.1027 |        |         | 8.7851   | 10.9494 |        |         |

**Table S11.** Experimental binodal weight fraction data for the systems composed of PEG 600 (1) + NaPA 8000 (2) + water + 5 wt% of [Ch]X, X = [DHP], [DHcit] and [Bit], determined at 300.15K.

| [Ch][DHP] |         | [Ch][DHcit] |        |         |         | [Ch][Bit] |        |         |         |
|-----------|---------|-------------|--------|---------|---------|-----------|--------|---------|---------|
| 100 w1    | 100 w2  | 100 w1      | 100 w2 | 100 w1  | 100 w2  | 100 w1    | 100 w2 | 100 w1  | 100 w2  |
| 24.4297   | 3.1373  | 57.6120     | 0.7478 | 17.0602 | 7.9706  | 62.2136   | 1.7814 | 14.6365 | 9.8653  |
| 21.0999   | 4.5286  | 34.3054     | 2.7416 | 16.8770 | 8.0700  | 52.5733   | 2.3021 | 14.0050 | 10.2305 |
| 18.8096   | 5.3104  | 31.3698     | 3.2824 | 16.6071 | 8.2083  | 44.6771   | 3.2771 | 12.6883 | 11.1395 |
| 16.8888   | 6.1427  | 30.1640     | 3.4983 | 16.2660 | 8.4998  | 37.3126   | 3.8869 | 11.2239 | 11.7630 |
| 15.0411   | 6.9715  | 28.0897     | 3.9969 | 16.0804 | 8.5396  | 32.3674   | 4.2323 | 10.6607 | 12.5969 |
| 11.7951   | 9.3382  | 26.4449     | 4.3812 | 15.6927 | 8.6625  | 29.9647   | 4.4224 | 9.2180  | 13.6766 |
| 11.5536   | 9.5282  | 25.9101     | 4.4693 | 15.2476 | 8.9554  | 28.6764   | 4.6788 | 8.0577  | 15.5889 |
| 9.8168    | 10.9834 | 24.8802     | 4.7702 | 14.9280 | 9.3237  | 27.0796   | 4.9042 | 4.8035  | 19.3919 |
| 8.3572    | 12.1637 | 24.3640     | 4.8088 | 14.3502 | 9.4292  | 25.4448   | 5.4349 |         |         |
| 8.1333    | 12.3493 | 23.7758     | 5.0868 | 14.2403 | 9.7241  | 24.3991   | 5.5574 |         |         |
| 6.2687    | 14.3867 | 22.9845     | 5.3585 | 14.0816 | 9.7553  | 23.2431   | 5.9013 |         |         |
| 4.2163    | 16.5466 | 22.8497     | 5.4682 | 13.7589 | 9.9232  | 23.1088   | 6.1244 |         |         |
| 3.4545    | 17.8155 | 22.2941     | 5.7055 | 12.9219 | 10.2577 | 21.9647   | 6.3742 |         |         |
|           |         | 22.1434     | 5.7341 | 12.6329 | 10.4988 | 21.9000   | 6.4050 |         |         |
|           |         | 21.0172     | 6.0988 | 11.8999 | 10.9395 | 21.0747   | 6.7205 |         |         |
|           |         | 20.5719     | 6.3000 | 11.5913 | 11.2237 | 20.8167   | 6.7377 |         |         |
|           |         | 20.3958     | 6.4215 | 10.6640 | 11.8196 | 20.4978   | 6.9869 |         |         |
|           |         | 20.1778     | 6.4756 | 10.4120 | 12.1759 | 19.7306   | 7.1758 |         |         |
|           |         | 19.7313     | 6.6378 | 9.7228  | 12.6220 | 19.4539   | 7.3749 |         |         |
|           |         | 19.1847     | 6.9432 | 9.2715  | 13.0348 | 18.7232   | 7.6140 |         |         |
|           |         | 19.1301     | 7.0480 | 8.5963  | 13.4540 | 18.6921   | 7.7185 |         |         |
|           |         | 18.7089     | 7.1195 | 7.5510  | 14.1189 | 18.0215   | 7.9331 |         |         |
|           |         | 18.5329     | 7.2034 | 7.1311  | 14.5535 | 17.9061   | 7.9695 |         |         |
|           |         | 18.2212     | 7.2600 | 6.3375  | 15.7635 | 17.1094   | 8.3706 |         |         |
|           |         | 18.0815     | 7.4733 | 5.9758  | 16.6236 | 16.5921   | 8.6832 |         |         |
|           |         | 17.9678     | 7.5607 | 4.1325  | 18.8669 | 16.4422   | 8.8648 |         |         |
|           |         | 17.6495     | 7.6487 |         |         | 15.5315   | 9.2420 |         |         |
|           |         | 17.2403     | 7.8416 |         |         | 14.9597   | 9.4808 |         |         |

**Table S12.** Experimental binodal weight fraction data for the systems composed of PEG 600 (1) + NaPA 8000 (2) + water + 10 wt% of [Ch]X, X = Cl and [Ac], determined at 300.15K.

| [Ch]Cl  |         |        |         | [Ch][Ac] |        |         |         |
|---------|---------|--------|---------|----------|--------|---------|---------|
| 100 w1  | 100 w2  | 100 w1 | 100 w2  | 100 w1   | 100 w2 | 100 w1  | 100 w2  |
| 33.8098 | 1.2398  | 8.1705 | 10.4166 | 27.8541  | 2.1921 | 11.1646 | 7.2578  |
| 29.0288 | 1.6864  | 8.0353 | 10.5816 | 23.7725  | 2.6356 | 11.1336 | 7.4373  |
| 24.1185 | 2.3956  | 7.8069 | 10.7905 | 21.0038  | 3.2577 | 10.8658 | 7.6617  |
| 22.4232 | 2.6884  | 7.6421 | 11.1562 | 19.0572  | 3.7062 | 10.6459 | 7.6953  |
| 20.9179 | 3.0110  | 7.3157 | 11.4379 | 17.4765  | 4.2566 | 10.6348 | 8.0266  |
| 19.8901 | 3.2123  | 7.0162 | 11.6977 | 16.0626  | 4.6955 | 10.1059 | 8.3503  |
| 19.1240 | 3.4469  | 6.7447 | 11.9426 | 15.1802  | 4.9763 | 9.7746  | 8.8310  |
| 18.5193 | 3.6591  | 6.5595 | 12.4101 | 14.8770  | 5.2821 | 9.3868  | 9.2572  |
| 17.8678 | 3.9131  | 6.2415 | 12.7316 | 14.0971  | 5.4846 | 8.7534  | 10.0790 |
| 17.3037 | 4.1315  | 5.9018 | 13.0505 | 14.0638  | 5.6902 | 7.9924  | 10.9372 |
| 16.6415 | 4.3996  | 5.5615 | 13.6539 | 13.2902  | 6.0645 | 7.1675  | 11.4964 |
| 16.1184 | 4.6542  | 5.0932 | 14.0409 | 12.8598  | 6.1815 | 6.4608  | 12.3581 |
| 15.6775 | 4.8248  | 4.8981 | 14.6600 | 12.7232  | 6.2690 | 5.6129  | 13.0196 |
| 15.0979 | 5.1190  | 4.3832 | 15.4369 | 12.5508  | 6.4575 | 5.3527  | 13.9997 |
| 14.7138 | 5.2535  | 3.8651 | 16.2147 | 12.3397  | 6.4896 | 4.4551  | 14.8685 |
| 14.0937 | 5.6117  | 3.4888 | 17.0616 | 12.2866  | 6.6947 | 3.9074  | 17.8842 |
| 13.5232 | 5.8942  | 2.9925 | 18.0287 | 11.7350  | 6.9114 | 2.1795  | 19.3297 |
| 12.9339 | 6.2679  | 2.5739 | 19.0805 | 11.5904  | 6.9924 |         |         |
| 8.4247  | 10.2259 |        |         | 11.5075  | 7.1677 |         |         |

**Table S13.** Experimental binodal weight fraction data for the systems composed of PEG 600 (1) + NaPA 8000 (2) + water + 10 wt% of [Ch]X, X = [DHP], [DHcit] and [Bit], determined at 300.15K.

| [Ch][DHP] |         | [Ch][DHcit] |        |         |         | [Ch][Bit] |         |
|-----------|---------|-------------|--------|---------|---------|-----------|---------|
| 100 w1    | 100 w2  | 100 w1      | 100 w2 | 100 w1  | 100 w2  | 100 w1    | 100 w2  |
| 24.2622   | 3.7772  | 57.7008     | 0.7470 | 18.2422 | 9.1211  | 53.9838   | 2.0020  |
| 22.5645   | 4.3317  | 43.6067     | 2.2085 | 17.5090 | 9.5403  | 29.0091   | 5.5580  |
| 19.2803   | 5.1759  | 41.8212     | 2.5107 | 16.6847 | 9.6117  | 25.4684   | 6.3242  |
| 18.1361   | 5.7163  | 37.1924     | 3.0831 | 16.2740 | 10.0302 | 23.9590   | 6.7033  |
| 16.2240   | 6.6013  | 34.4426     | 3.6504 | 14.4220 | 10.9499 | 22.6321   | 7.1083  |
| 14.4133   | 7.4698  | 34.0532     | 3.7162 | 13.1445 | 11.8696 | 21.0374   | 7.5796  |
| 13.0852   | 8.0834  | 32.4130     | 4.0329 | 12.4994 | 12.1696 | 19.6465   | 8.1072  |
| 12.8711   | 8.2794  | 32.2996     | 4.1263 | 11.4569 | 12.8258 | 18.6153   | 8.5936  |
| 11.5513   | 9.0994  | 31.5820     | 4.3774 | 8.3868  | 14.6167 | 18.2847   | 8.6814  |
| 10.1235   | 10.0553 | 29.3701     | 4.5725 | 7.9932  | 15.4458 | 16.5173   | 9.4150  |
| 9.9401    | 10.0842 | 29.2441     | 4.8510 | 7.3632  | 16.3044 | 16.5084   | 9.4426  |
| 8.8776    | 10.9433 | 28.0329     | 5.1974 | 6.1353  | 17.5624 | 15.3194   | 9.9462  |
| 8.0100    | 11.5083 | 27.3236     | 5.2199 |         |         | 15.2765   | 10.1471 |
| 7.6770    | 11.8974 | 26.4838     | 5.6045 |         |         | 14.3184   | 10.6612 |
| 7.1653    | 12.2866 | 25.5004     | 5.9582 |         |         | 13.9177   | 10.6845 |
| 6.6981    | 12.7102 | 24.9494     | 5.9719 |         |         | 13.1460   | 11.2538 |
| 6.3612    | 12.8534 | 24.8973     | 6.1904 |         |         | 12.6974   | 11.2884 |
| 5.8344    | 13.4980 | 24.0957     | 6.5038 |         |         | 11.9484   | 11.7203 |
| 5.7456    | 13.6158 | 23.0773     | 6.9327 |         |         | 11.9304   | 11.8820 |
| 4.6166    | 14.8434 | 22.6083     | 7.1602 |         |         | 10.5957   | 12.5898 |
| 4.1600    | 15.2644 | 21.9295     | 7.4383 |         |         | 10.4950   | 12.6188 |
| 3.7230    | 16.1346 | 21.0814     | 7.4995 |         |         | 9.8048    | 13.0426 |
| 2.5807    | 18.4114 | 21.0100     | 7.7438 |         |         | 9.1006    | 13.7079 |
|           |         | 20.5494     | 7.9938 |         |         | 8.3796    | 14.3174 |
|           |         | 20.0131     | 8.2012 |         |         | 7.4384    | 15.1124 |
|           |         | 19.4158     | 8.2610 |         |         | 6.5307    | 16.0870 |
|           |         | 19.3408     | 8.4990 |         |         | 5.4420    | 17.2158 |
|           |         | 18.7788     | 8.8020 |         |         | 4.4598    | 18.6537 |

**Table S14.** Experimental binodal weight fraction data for the systems composed of PEG 600 (1) + NaPA 8000 (2) + water, determined at 300.15K.

| 0% electrolyte |         |         |         |
|----------------|---------|---------|---------|
| 100 w1         | 100 w2  | 100 w1  | 100 w2  |
| 28.1862        | 2.3155  | 11.5343 | 10.3369 |
| 26.3684        | 2.4134  | 11.1387 | 10.5996 |
| 24.4414        | 3.1864  | 11.1088 | 10.8985 |
| 21.7966        | 3.8956  | 10.6981 | 10.9633 |
| 20.0505        | 4.7358  | 10.4649 | 11.4550 |
| 19.0319        | 4.9585  | 10.2736 | 11.5971 |
| 17.9428        | 5.5830  | 9.7014  | 12.3906 |
| 16.8543        | 6.1602  | 8.5098  | 13.0199 |
| 15.9753        | 6.8495  | 8.0010  | 13.4899 |
| 14.9248        | 7.5844  | 7.6666  | 14.0553 |
| 14.1999        | 8.1486  | 7.1280  | 14.6505 |
| 14.0782        | 8.1741  | 6.4816  | 15.2321 |
| 13.8352        | 8.4629  | 6.0404  | 15.8321 |
| 13.4004        | 8.8689  | 5.4144  | 16.6881 |
| 12.9887        | 9.0204  | 4.6406  | 17.5635 |
| 12.9746        | 9.3627  | 3.7826  | 18.3779 |
| 12.3537        | 9.7816  | 3.2772  | 19.8021 |
| 12.0381        | 9.8544  | 2.3425  | 22.2530 |
| 11.7856        | 10.2621 | 1.2223  | 26.8263 |



**Table S15.** Experimental binodal weight fraction data for the systems composed of PEG 600 (1) + NaPA 8000 (2) + X wt% NaCl + water, determined at 300.15K.

| 1% NaCl |         | 2.5% NaCl |        | 5% NaCl |        | 10% NaCl |        |
|---------|---------|-----------|--------|---------|--------|----------|--------|
| 100 w1  | 100 w2  | 100 w1    | 100 w2 | 100 w1  | 100 w2 | 100 w1   | 100 w2 |
| 17.2277 | 1.5059  | 10.4369   | 2.4620 | 9.7524  | 1.1381 | 6.9431   | 1.8493 |
| 16.8456 | 1.6611  | 10.1728   | 2.6386 | 6.8700  | 3.0212 | 6.6506   | 2.1035 |
| 16.4354 | 1.8353  | 10.1459   | 2.7806 | 6.7609  | 3.2235 | 6.3935   | 2.4682 |
| 16.3977 | 2.0065  | 9.8901    | 2.9225 | 6.6485  | 3.3607 | 6.3454   | 2.6134 |
| 16.1190 | 2.1954  | 9.8368    | 3.0401 | 6.6475  | 3.5243 | 6.2873   | 2.8898 |
| 15.6502 | 2.4266  | 9.6628    | 3.0704 | 6.6038  | 3.6724 | 6.2315   | 3.2978 |
| 15.0973 | 2.6427  | 9.6325    | 3.2331 | 6.5173  | 3.8395 | 6.1299   | 3.5028 |
| 14.8733 | 2.8979  | 9.4061    | 3.3817 | 6.4152  | 4.0290 | 6.1156   | 3.6748 |
| 14.7071 | 3.0860  | 9.2592    | 3.4786 | 6.3559  | 4.0727 | 6.1001   | 3.8034 |
| 14.2942 | 3.2562  | 9.1993    | 3.5823 | 6.3523  | 4.2108 | 6.0451   | 3.9976 |
| 14.2942 | 3.5151  | 9.1268    | 3.6988 | 6.3005  | 4.3604 | 6.0377   | 4.1979 |
| 14.1486 | 3.5854  | 9.1150    | 3.7033 | 6.2874  | 4.5180 | 6.0259   | 4.4846 |
| 13.6075 | 3.8082  | 9.0902    | 3.8325 | 6.2630  | 4.5827 | 6.0238   | 4.7984 |
| 13.4239 | 4.0738  | 9.0513    | 4.0224 | 6.2612  | 4.7656 | 5.9965   | 4.9936 |
| 13.1657 | 4.5253  | 8.7709    | 4.2629 | 6.2071  | 4.9325 | 5.9468   | 5.3306 |
| 12.1490 | 5.2624  | 8.7383    | 4.4183 | 6.1371  | 5.0532 | 5.9416   | 5.6081 |
| 11.9073 | 5.3613  | 8.6878    | 4.6065 | 6.1083  | 5.1791 | 5.9248   | 5.8107 |
| 10.8083 | 6.3419  | 8.5615    | 4.7943 | 6.0770  | 5.3271 | 5.8545   | 6.2596 |
| 9.6893  | 7.5211  | 8.3995    | 4.9919 | 6.0606  | 5.4523 | 5.8133   | 6.6605 |
| 9.6522  | 8.0889  | 8.2832    | 5.2292 | 6.0320  | 5.5932 | 5.7491   | 7.1507 |
| 8.5663  | 8.9005  | 8.1202    | 5.4726 | 5.9968  | 5.7574 |          |        |
| 8.4481  | 8.9575  | 7.8924    | 5.7462 | 5.9918  | 5.9227 |          |        |
| 7.7732  | 10.0301 | 7.7878    | 6.1399 | 5.9521  | 6.2681 |          |        |
| 7.4299  | 10.1247 | 7.6021    | 6.5350 | 5.9379  | 6.4509 |          |        |
| 6.6785  | 11.0775 | 7.4205    | 7.0039 |         |        |          |        |
| 6.6268  | 11.2249 | 7.0262    | 7.3023 |         |        |          |        |
| 5.8685  | 12.1191 | 6.8127    | 7.6839 |         |        |          |        |
| 5.8053  | 13.2133 | 6.6898    | 8.4605 |         |        |          |        |
|         |         | 6.3199    | 9.1702 |         |        |          |        |

**Table S16.** Experimental binodal weight fraction data for the systems composed of PEG 600 (1) + NaPA 8000 (2) + X wt% NaOAc + water, determined at 300.15K.

| 1% NaOAc |         | 2.5% NaOAc |         | 5% NaOAc |         | 10% NaOAc |         |
|----------|---------|------------|---------|----------|---------|-----------|---------|
| 100 w1   | 100 w2  | 100 w1     | 100 w2  | 100 w1   | 100 w2  | 100 w1    | 100 w2  |
| 19.3517  | 1.4499  | 11.5672    | 2.0871  | 7.5842   | 1.7595  | 4.0474    | 2.5347  |
| 17.8943  | 2.1739  | 11.0203    | 2.6575  | 1.9108   | 20.3352 | 3.7360    | 2.8020  |
| 15.9907  | 3.4263  | 10.7207    | 2.8393  | 3.3660   | 15.5819 | 3.7144    | 3.3493  |
| 15.7231  | 3.4781  | 10.6557    | 2.9011  | 3.9943   | 12.3599 | 3.6471    | 4.1339  |
| 15.3646  | 3.7041  | 10.5358    | 3.0224  | 4.4034   | 10.2249 | 3.6225    | 5.2654  |
| 14.7547  | 3.9547  | 10.4570    | 3.2040  | 4.8282   | 8.9778  | 3.5464    | 7.4493  |
| 14.6236  | 4.1613  | 10.2263    | 3.4139  | 5.0807   | 7.9204  | 3.3746    | 8.7767  |
| 14.4616  | 4.3676  | 9.9893     | 3.6382  | 5.2460   | 6.9657  | 3.3624    | 12.7964 |
| 13.9382  | 4.8350  | 9.8233     | 3.9412  | 5.4476   | 6.3581  | 2.4683    | 19.1114 |
| 13.6525  | 5.1459  | 9.4839     | 4.1035  | 5.5664   | 5.8610  |           |         |
| 13.1074  | 5.3799  | 9.3613     | 4.2687  | 5.7384   | 5.4368  |           |         |
| 12.6583  | 5.6362  | 9.2646     | 4.4158  | 5.9018   | 5.0673  |           |         |
| 12.5262  | 5.8883  | 8.9903     | 4.6895  | 5.8969   | 4.6454  |           |         |
| 12.4174  | 6.1020  | 8.7750     | 4.8478  | 5.9499   | 4.3674  |           |         |
| 12.2418  | 6.3194  | 8.6162     | 5.1112  | 6.0730   | 4.1337  |           |         |
| 12.0004  | 6.5790  | 8.5871     | 5.3586  | 6.2211   | 3.9123  |           |         |
| 11.2504  | 6.9831  | 8.5174     | 5.4131  | 6.1894   | 3.6714  |           |         |
| 11.2040  | 7.0145  | 8.4119     | 5.7421  | 6.5471   | 3.4646  |           |         |
| 10.9142  | 7.3311  | 8.0727     | 5.9663  | 6.7512   | 3.2108  |           |         |
| 10.6580  | 7.6418  | 7.9605     | 6.3732  | 6.7478   | 2.9059  |           |         |
| 10.2744  | 8.0149  | 7.8086     | 6.5464  | 6.7741   | 2.7172  |           |         |
| 9.8161   | 8.4479  | 7.6223     | 6.8901  |          |         |           |         |
| 9.3218   | 8.8936  | 7.3922     | 7.1490  |          |         |           |         |
| 9.1732   | 8.9992  | 7.3542     | 7.4286  |          |         |           |         |
| 8.9360   | 9.4231  | 7.0811     | 8.0175  |          |         |           |         |
| 8.4234   | 10.0569 | 6.6180     | 8.4318  |          |         |           |         |
| 7.6839   | 10.5676 | 6.5579     | 8.5931  |          |         |           |         |
| 7.6387   | 10.6748 | 6.2344     | 9.4226  |          |         |           |         |
| 7.0424   | 11.4436 | 5.9438     | 9.4322  |          |         |           |         |
| 6.3855   | 12.2480 | 5.7305     | 10.4384 |          |         |           |         |
| 5.5832   | 13.2887 | 5.1132     | 11.6585 |          |         |           |         |
| 4.8133   | 15.3705 | 4.4004     | 13.2560 |          |         |           |         |
| 3.6412   | 17.9291 | 3.6060     | 16.2482 |          |         |           |         |
| 2.0918   | 19.8026 | 2.2504     | 20.7383 |          |         |           |         |

**Table S17.** Correlation parameters to describe the binodal curve, where  $A$ ,  $B$  and  $C$  are constants obtained by the regression of the experimental binodal data through the application of Eq. (1) (and respective standard deviations,  $\sigma$ , and correlation coefficients,  $R^2$ ) for the system composed of PEG 600 + NaPA 8000.

| 0 wt % of [Ch]X     |                  |
|---------------------|------------------|
| $R^2$               | 0.9977           |
| $A \pm \sigma$      | $54.17 \pm 2.03$ |
| $B \pm \sigma$      | $-0.45 \pm 0.02$ |
| $10^5 C \pm \sigma$ | $9.65 \pm 1.28$  |

**Table S18.** Correlation parameters to describe the binodal curves, where  $A$ ,  $B$  and  $C$  are constants obtained by the regression of the experimental binodal data through the application of Eq. (1) (and respective standard deviations,  $\sigma$ , and correlation coefficients,  $R^2$ ) for the systems composed of PEG 600 + NaPA 8000 + [Ch]Cl.

|                     | 1 wt % of [Ch]Cl | 2.5 wt % of [Ch]Cl | 5 wt % of [Ch]Cl | 10 wt % of [Ch]Cl |
|---------------------|------------------|--------------------|------------------|-------------------|
| $R^2$               | 0.9954           | 0.9938             | 0.9990           | 0.9971            |
| $A \pm \sigma$      | $44.31 \pm 1.35$ | $62.76 \pm 1.79$   | $56.58 \pm 0.87$ | $68.84 \pm 1.48$  |
| $B \pm \sigma$      | $-0.37 \pm 0.01$ | $-0.57 \pm 0.01$   | $-0.54 \pm 0.01$ | $-0.67 \pm 0.01$  |
| $10^5 C \pm \sigma$ | $18.14 \pm 1.31$ | $8.24 \pm 1.30$    | $9.58 \pm 0.60$  | $2.11 \pm 1.16$   |

**Table S19.** Correlation parameters to describe the binodal curves, where  $A$ ,  $B$  and  $C$  are constants obtained by the regression of the experimental binodal data through the application of Eq. (1) (and respective standard deviations,  $\sigma$ , and correlation coefficients,  $R^2$ ) for the systems composed of PEG 600 + NaPA 8000 + [Ch][Ac].

|                     | 1 wt % of [Ch][Ac] | 2.5 wt % of [Ch][Ac] | 5 wt % of [Ch][Ac] | 10 wt % of [Ch][Ac] |
|---------------------|--------------------|----------------------|--------------------|---------------------|
| $R^2$               | 0.9972             | 0.9977               | 0.9920             | 0.9941              |
| $A \pm \sigma$      | $62.07 \pm 2.36$   | $69.26 \pm 1.41$     | $71.75 \pm 3.40$   | $75.18 \pm 2.33$    |
| $B \pm \sigma$      | $-0.53 \pm 0.02$   | $-0.62 \pm 0.01$     | $-0.66 \pm 0.02$   | $-0.70 \pm 0.01$    |
| $10^5 C \pm \sigma$ | $7.90 \pm 0.99$    | $0.83 \pm 0.88$      | $-1.42 \pm 1.61$   | $1.31 \pm 1.42$     |

**Table S20.** Correlation parameters to describe the binodal curves, where  $A$ ,  $B$  and  $C$  are constants obtained by the regression of the experimental binodal data through the application of Eq. (1) (and respective standard deviations,  $\sigma$ , and correlation coefficients,  $R^2$ ) for the systems composed of PEG 600 + NaPA 8000 + [Ch][DHP].

|                     | 1 wt % of [Ch][DHP] | 2.5 wt % of [Ch][DHP] | 5 wt % of [Ch][DHP] | 10 wt % of [Ch][DHP] |
|---------------------|---------------------|-----------------------|---------------------|----------------------|
| $R^2$               | 0.9986              | 0.9920                | 0.9988              | 0.9994               |
| $A \pm \sigma$      | $55.87 \pm 1.65$    | $78.45 \pm 1.91$      | $59.03 \pm 2.08$    | $78.88 \pm 1.94$     |
| $B \pm \sigma$      | $-0.47 \pm 0.01$    | $-0.63 \pm 0.01$      | $-0.49 \pm 0.02$    | $-0.60 \pm 0.01$     |
| $10^5 C \pm \sigma$ | $10.14 \pm 1.12$    | $0.00 \pm 2.51$       | $13.68 \pm 1.22$    | $1.56 \pm 0.80$      |

**Table S21.** Correlation parameters to describe the binodal curves, where  $A$ ,  $B$  and  $C$  are constants obtained by the regression of the experimental binodal data through the application of Eq. (1) (and respective standard deviations,  $\sigma$ , and correlation coefficients,  $R^2$ ) for the systems composed of PEG 600 + NaPA 8000 + [Ch][DHcit].

|                     | 1 wt % of [Ch][DHcit] | 2.5 wt % of [Ch][DHcit] | 5 wt % of [Ch][DHcit] | 10 wt % of [Ch][DHcit] |
|---------------------|-----------------------|-------------------------|-----------------------|------------------------|
| $R^2$               | 0.9985                | 0.9918                  | 0.9980                | 0.9984                 |
| $A \pm \sigma$      | $61.65 \pm 2.49$      | $92.46 \pm 2.63$        | $95.45 \pm 0.97$      | $90.76 \pm 0.96$       |
| $B \pm \sigma$      | $-0.51 \pm 0.02$      | $-0.64 \pm 0.01$        | $-0.60 \pm 0.01$      | $-0.51 \pm 0.01$       |
| $10^5 C \pm \sigma$ | $6.48 \pm 1.35$       | $2.33 \pm 1.34$         | $6.54 \pm 0.68$       | $11.69 \pm 0.79$       |

**Table S22.** Correlation parameters to describe the binodal curves, where  $A$ ,  $B$  and  $C$  are constants obtained by the regression of the experimental binodal data through the application of Eq. (1) (and respective standard deviations,  $\sigma$ , and correlation coefficients,  $R^2$ ) for the systems composed of PEG 600 + NaPA 8000 + [Ch][Bit].

|                     | 1 wt % of [Ch][Bit] | 2.5 wt % of [Ch][Bit] | 5 wt % of [Ch][Bit] | 10 wt % of [Ch][Bit] |
|---------------------|---------------------|-----------------------|---------------------|----------------------|
| $R^2$               | 0.9782              | 0.9865                | 0.9917              | 0.9996               |
| $A \pm \sigma$      | $105.68 \pm 8.30$   | $122.12 \pm 9.17$     | $196.48 \pm 6.83$   | $138.99 \pm 1.29$    |
| $B \pm \sigma$      | $-0.72 \pm 0.04$    | $-0.76 \pm 0.04$      | $-0.87 \pm 0.02$    | $-0.67 \pm 0.00$     |
| $10^5 C \pm \sigma$ | $-1.61 \pm 2.78$    | $-2.64 \pm 2.69$      | $-5.40 \pm 2.14$    | $9.74 \pm 0.44$      |

**Table S23.** Number of moles of  $[\text{Ch}]^+$  at each phase, the volume of the phase, and  $K_p$  values of  $[\text{Ch}]^+$ .

| Phase                                         | [Ch]Cl   |          | [Ch][Ac] |          | [Ch][DHP] |          | [Ch][DHcit] |          | [Ch][Bit] |          |
|-----------------------------------------------|----------|----------|----------|----------|-----------|----------|-------------|----------|-----------|----------|
|                                               | top      | bot      | top      | bot      | top       | bot      | top         | bot      | top       | bot      |
| <b>n <math>[\text{Ch}]^+</math><br/>(mol)</b> | 7.33E-03 | 3.71E-05 | 6.72E-03 | 3.65E-05 | 6.18E-03  | 7.93E-05 | 7.42E-03    | 5.30E-04 | 7.85E-03  | 4.56E-04 |
| <b>Volume(mL)</b>                             | 6.5      | 2        | 7        | 2        | 5.9       | 2.9      | 7           | 1.7      | 7         | 1.9      |
| <b><math>K_p</math></b>                       | 60.89    |          | 52.54    |          | 38.28     |          | 3.40        |          | 4.68      |          |

**Table S24.** Concentration of chloride anion at each corresponding phase (determined using a chloride-selective electrode), the absolute values of the integral of the  $^1\text{H}$  RNM peaks of the anions, and  $K_p$  values of the anion for each electrolyte in the ABS.  $\text{X}^-$  is the chloride, acetate, bitartrate and dihydrogencitrate anions of the added electrolytes.

| Phase                                              | NaCl     |      | [Ch]Cl |     | Na[Ac]  |          | [Ch][Ac] |          | [Ch][DHcit] |              | [Ch][Bit] |          |
|----------------------------------------------------|----------|------|--------|-----|---------|----------|----------|----------|-------------|--------------|-----------|----------|
|                                                    | top      | bot  | top    | bot | top     | bot      | top      | bot      | top         | bot          | top       | bot      |
| <b><math>\text{Cl}^-</math> conc.<br/>(mmol/L)</b> | 217<br>5 | 1275 | 900    | 300 | -       | -        | -        | -        | -           | -            | -         | -        |
| <b>Integrals<br/>of RMN<br/>peaks</b>              | -        | -    | -      | -   | 1.1E+08 | 5.77E+07 | 4.82E+07 | 1.90E+07 | 1.11E+08    | 5.25E+0<br>7 | 1.21E+08  | 6.56E+07 |
| <b><math>K_p \text{ X}^-</math></b>                | 1.71     |      | 3      |     | 1.90    |          | 2.53     |          | 2.21        |              | 1.86      |          |

**Table S25.** Concentration of sodium cation at each corresponding phase (determined using a sodium-selective electrode),  $K_p$  and log  $K_p$  values of sodium cation in studied ABSs.

| Phase                                              | [Ch]Cl |      | [Ch][Ac] |      | [Ch][DHcit] |      | [Ch][Bit] |      | NaCl     |       | Na[Ac]   |          | Without<br>electrolyte |          |
|----------------------------------------------------|--------|------|----------|------|-------------|------|-----------|------|----------|-------|----------|----------|------------------------|----------|
|                                                    | top    | bot  | top      | bot  | top         | bot  | top       | bot  | top      | bot   | top      | Bot      | top                    | bot      |
| <b><math>\text{Na}^+</math> conc.<br/>(mmol/L)</b> | 550    | 4550 | 575      | 4950 | 1250        | 3325 | 1225      | 4200 | 450<br>0 | 10700 | 292<br>5 | 875<br>0 | 250                    | 725<br>0 |
| <b><math>K_p</math></b>                            | 0.12   |      | 0.12     |      | 0.38        |      | 0.29      |      | 0.42     |       | 0.33     |          | 0.03                   |          |
| <b>Log <math>K_p</math></b>                        | -0.92  |      | -0.93    |      | -0.42       |      | -0.54     |      | -0.38    |       | -0.48    |          | -1.46                  |          |
